# Supplementary material for: Maternal Origins and Haplotype Diversity of Seven Russian Goat Populations Based on the D-loop Sequence Variability
Source: MDPI journal article supplement (doi:10.3390/ani10091603), 2020-09-09
Supplement: s1 [file s1]

| #  | Breed (species)                             | Geographical origin | NCBI accession number | Haplogroup | Reference              |
|----|---------------------------------------------|---------------------|-----------------------|------------|------------------------|
| 1  | Girgentana                                  | Italy               | KR059177              | A          | Colli et al., 2015     |
| 2  | Mati                                        | Albania             | KR059146              | A          | Colli et al., 2015     |
| 3  | Muzhake                                     | Albania             | KR059170              | A          | Colli et al., 2015     |
| 4  | Swiss Alpine                                | Switzerland         | KR059181              | A          | Colli et al., 2015     |
| 5  | Verata                                      | Spain               | KR059168              | A          | Colli et al., 2015     |
| 6  | Laos                                        | Laos                | AB044303              | B          | Mannen et al., 2001    |
| 7  | Malaysia                                    | Malaysia            | KR059220              | B          | Colli et al., 2015     |
| 8  | Bezoar goat<br>( <i>Capra aegagrus</i> )    | Iran                | KR059219              | B          | Colli et al., 2015     |
| 9  | Payoya                                      | Spain               | KR059225              | C          | Colli et al., 2015     |
| 10 | Kyrgyzstan                                  | Kyrgyzstan          | KR059212              | D          | Colli et al., 2015     |
| 11 | Bezoar goat<br>( <i>Capra aegagrus</i> )    | Iran                | KR059210              | D          | Colli et al., 2015     |
| 12 | Bezoar goat<br>( <i>Capra aegagrus</i> )    | Iran                | KR059226              | F          | Colli et al., 2015     |
| 13 | Kermanshah                                  | Iran                | KR059213              | G          | Colli et al., 2015     |
| 14 | Khalkhali                                   | Iran                | KR059218              | G          | Colli et al., 2015     |
| 15 | Bezoar goat<br>( <i>Capra aegagrus</i> )    | NA                  | NC_028161             | G          | Unpublished<br>(Zhang) |
| 16 | Caucasian tur<br>( <i>Capra caucasica</i> ) | NA                  | NC_020683             | Outgroup   | Hassanin et al., 2012  |

## References

Colli, L.; Lancioni, H.; Cardinali, I.; Olivieri, A.; Capodiferro, M.R.; Pellecchia, M.; Rzepus, M.; Zamani, W.; Naderi, S.; Gandini, F.; et al. Whole mitochondrial genomes unveil the impact of domestication on goat matrilineal variability. *BMC Genomics* 2015, 16, 1115. <https://doi.org/10.1186/s12864-015-2342-2>.

Mannen, H.; Nagata, Y.; Tsuji, S. Mitochondrial DNA reveal that domestic goat (*Capra hircus*) are genetically affected by two subspecies of bezoar (*Capra aegagrus*). *Biochemical genetics* 2001, 39(5-6), 145–154. <https://doi.org/10.1023/a:1010266207735>

Zhang, K.; Chen, X.; Zhao, S. Complete mitochondrial genome of the wild goat (*Capra aegagrus*). Unpublished

Hassanin, A.; Delsuc, F.; Ropiquet, A.; Hammer, C.; Jansen van Vuuren, B.; Matthee, C.; Ruiz-Garcia, M.; Catzeflis, F.; Areskoug, V.; Nguyen, T. T.; Couloux, A. Pattern and timing of diversification of Cetartiodactyla (Mammalia, Laurasiatheria), as revealed by a comprehensive analysis of mitochondrial genomes. *Comptes rendus biologies* 2012, 335(1), 32-50. <https://doi.org/10.1016/j.crv.2011.11.002>
